# Supplementary material for: Enhancement of neural stem cell survival, proliferation and differentiation by IGF-1 delivery in graphene oxide-incorporated PLGA electrospun nanofibrous mats
Source: Royal Society of Chemistry journal article supplement (doi:10.1039/c8ra10103e), 2019-01-01
Supplement: c8ra10103e1.pdf [file c8ra10103e1.pdf]

## Supplementary Methods

### Raman spectra

The composition of graphene oxide-incorporated electrospun mats was analyzed by Raman spectroscopy. The Raman spectra were obtained by a Raman spectrometer (Micro Raman PL Mapping System, Dongwoo Optron Co., Kwangju, Korea) with excitation at 514.5 nm.

### Supplementary Figures

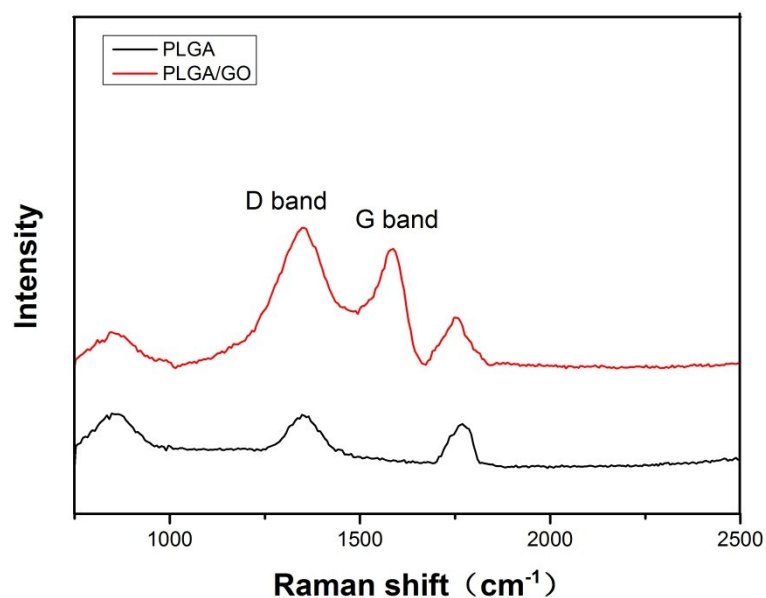

**Fig 1. Raman spectra of PLGA and PLGA/GO fibres.**

Raman is a spectroscopic technique to identify the presence of GO in PLGA/GO electrospun mats. Raman spectra of GO was shown in Supplementary Figure 1. Our result indicated the characteristic feature of GO peaks including D band and G band at frequencies around 1350 and 1590 cm<sup>-1</sup>, respectively.
